# Supplementary material
Source: publisher figshare collection journal article supplement (https://karger.figshare.com/articles/dataset/_/5241352)
Supplement: Supplementary file 1 [file 1 › 000332822_sm_Erratum.PDF]

## Erratum

---

In the article 'Gonadotropin-Inhibitory Hormone Is a Hypothalamic Peptide That Provides a Molecular Switch between Reproduction and Feeding' by Clarke et al. [Neuroendocrinology 2012;95:305–316], the second affiliation of Robert P. Millar was missing. It is 'Mammal Research Institute, Department of Zoology, University of Pretoria, Pretoria, South Africa'.
